# Supplementary material
Source: PubMed Central journal article supplement (PMC7521830)
Supplement: NIHMS1621925-supplement-Supporting_Figure_S1.pdf [file NIHMS1621925-supplement-Supporting_Figure_S1.pdf]

## Supporting Figure S1

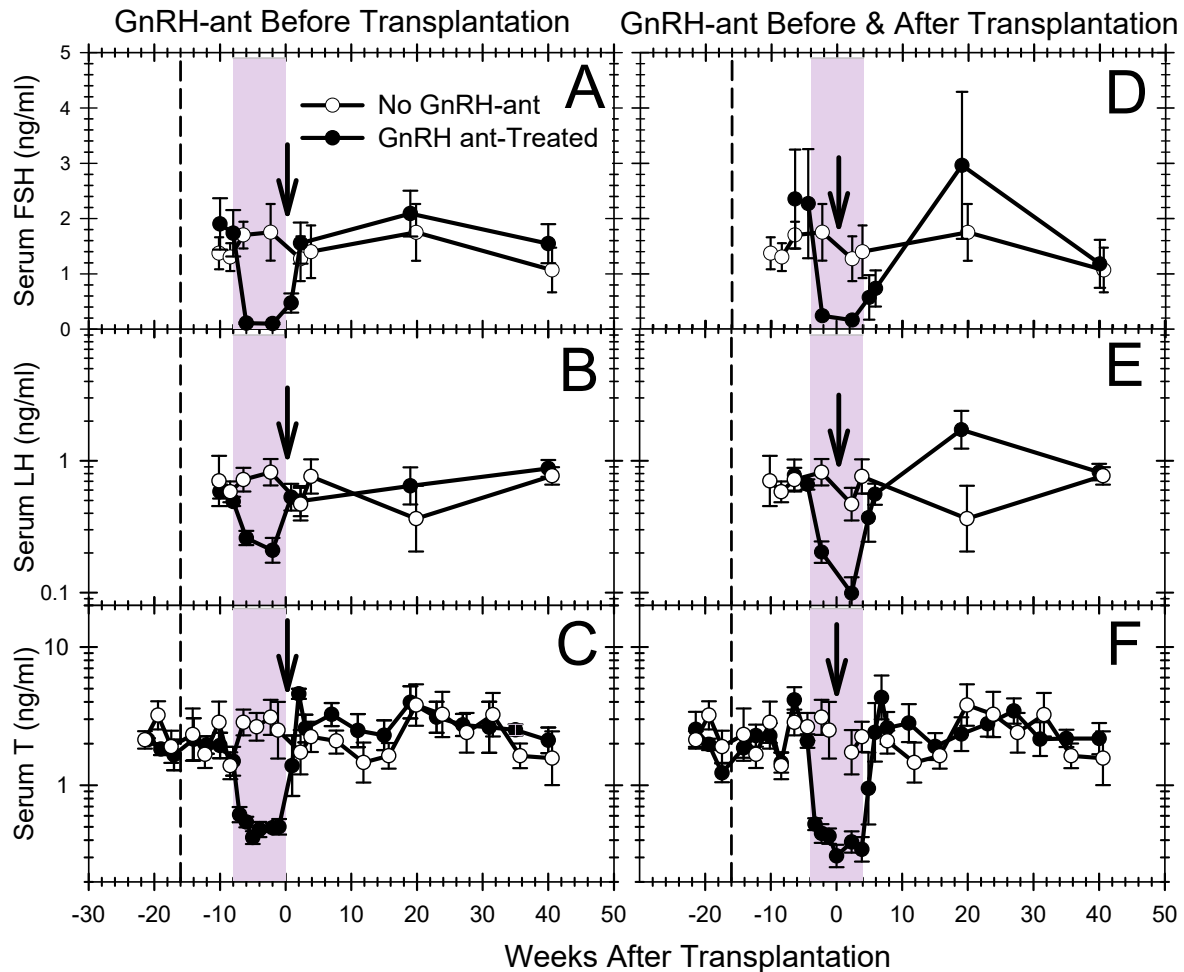

**Supporting Figure S1.** Changes in FSH, LH and testosterone (T) levels in the monkeys during hormone-suppression treatment and after transplantation. There were reversible declines resulting from the GnRH-ant treatment (area filled in pink), in the two groups of monkeys that received GnRH-ant (filled circles) either before transplantation (A-C) (n=5) or both before and after transplantation (D-F) (n=5), as compared to those that did not receive GnRH-ant (open circles) (n=5). The dotted vertical line represents the time of testicular irradiation. Downward arrows indicate time of transplantation.
