# Supplementary material
Source: PubMed Central journal article supplement (PMC7521830)
Supplement: NIHMS1621925-supplement-Supporting_Figure_S4.pdf [file NIHMS1621925-supplement-Supporting_Figure_S4.pdf]

## Supporting Figure S4

- ▶ Donor
- ▶ Recipient
- ▶ Common Allele

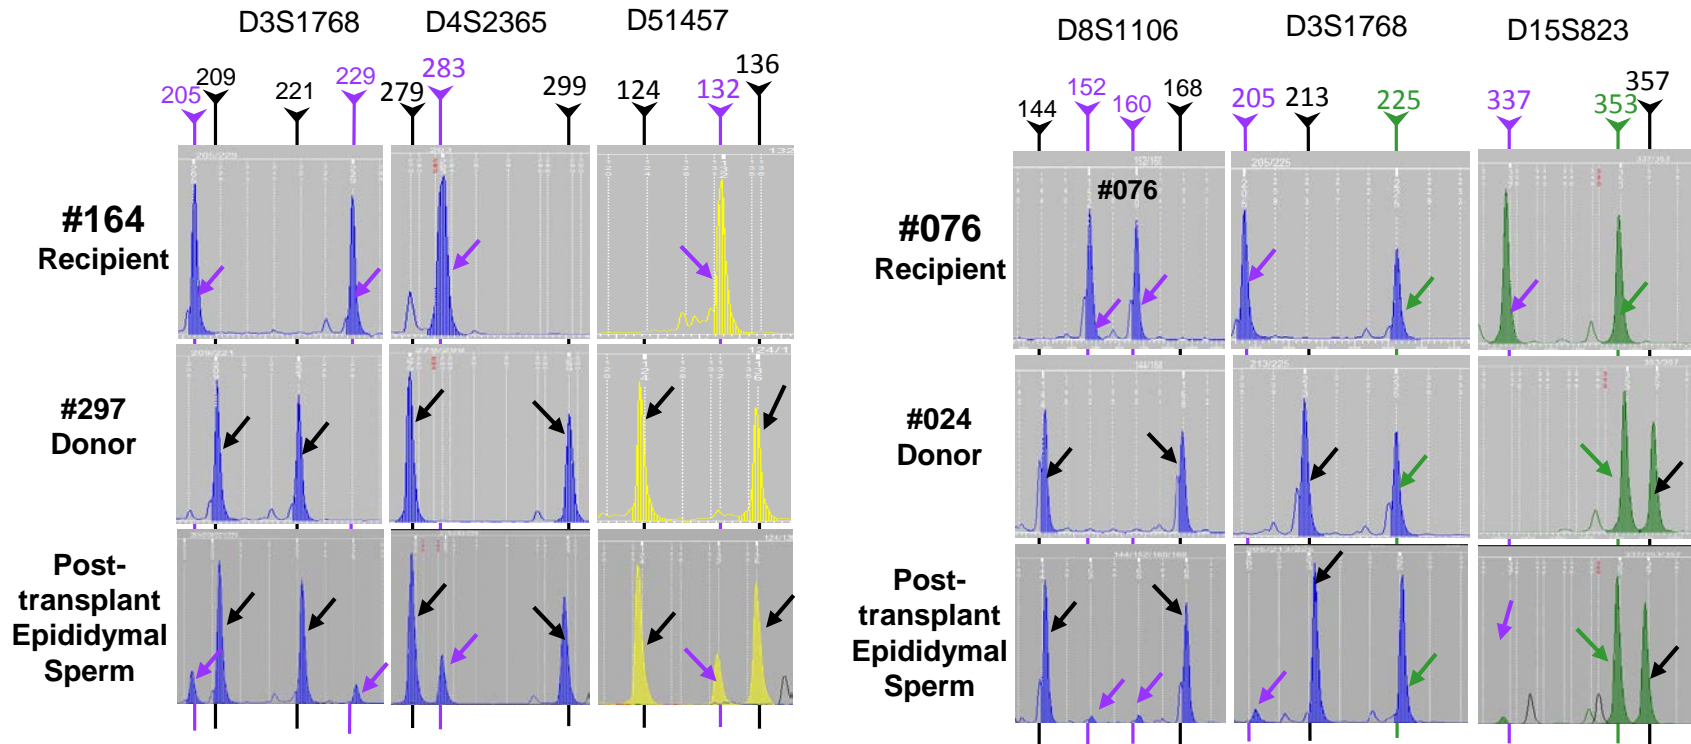

**Supporting Figure S4.** Microsatellite analysis of multiple loci to confirm donor origin of the epididymal sperm. Microsatellite analyses of the tissues from the recipient (blood) and the donor (testis) along with that of the sperm retrieved from the cauda epididymis corresponding to the transplanted testis to confirm the donor origin of the sperm in two recipient monkeys, #164 and #076, which had high contributions of donor sperm. The analyses of three representative loci, shown above each column of the electropherograms are displayed for samples corresponding to each recipient. Note the presence of unique donor (black line and arrow) and recipient (purple line and arrow) alleles at all these loci in addition to the presence of alleles common for both the donor and the recipient (green line and arrow). The relative peak heights of these unique alleles was used to calculate the donor contribution in the sperm sample (Supporting table S5).
