# Supplementary material
Source: PubMed Central journal article supplement (PMC7521830)
Supplement: NIHMS1621925-supplement-Supporting_Figure_S5.pdf [file NIHMS1621925-supplement-Supporting_Figure_S5.pdf]

## Supporting Figure S5

- ▶ Donor
- ▶ Recipient
- ▶ Common Allele

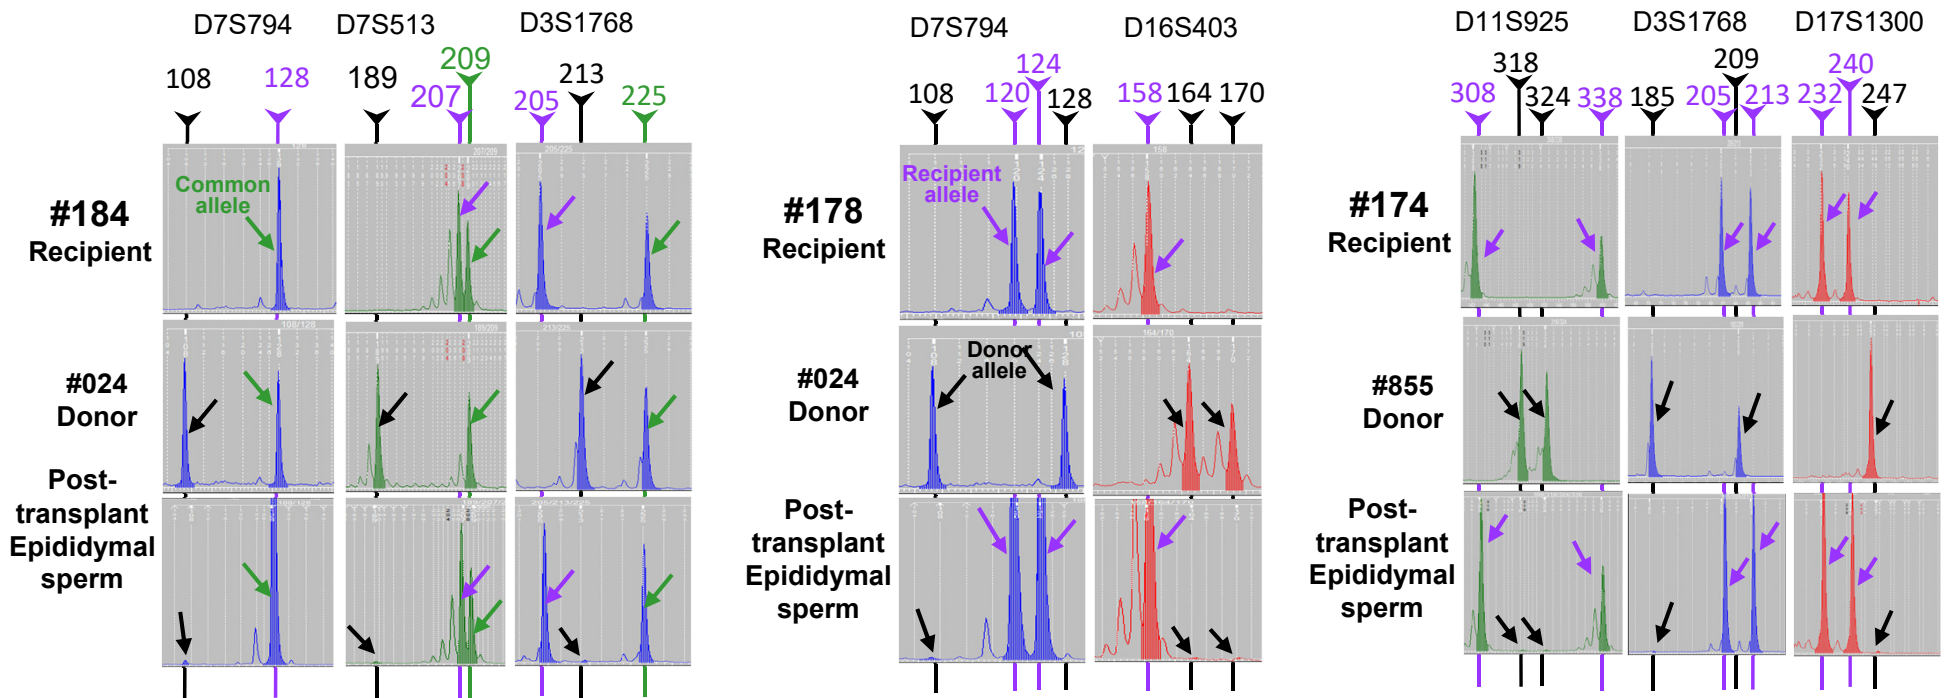

**Supporting Figure S5.** Multiple loci microsatellite analysis to confirm donor origin of the sperm in monkeys with low donor sperm contribution. The analyses of 2-3 loci, shown above each column of the electropherograms are displayed for the donor and recipient males and epididymal sperm samples from #184, #178 and #174, all of which had low percentages of donor sperm. The recipient profiles were expanded to identify the small donor peaks. Donor alleles (black line and arrow), recipient allele (purple line and arrow) and alleles common for both the donor and the recipient (green line and arrow) are indicated. The relative peak heights of these unique alleles was used to calculate the donor contribution in the sperm sample (Supporting table S5).
