# Supplementary material
Source: PubMed Central journal article supplement (PMC7521830)
Supplement: NIHMS1621925-supplement-Supporting_Figure_S6.pdf [file NIHMS1621925-supplement-Supporting_Figure_S6.pdf]

## Supporting Figure S6

### Embryos Derived from Donor Sperm

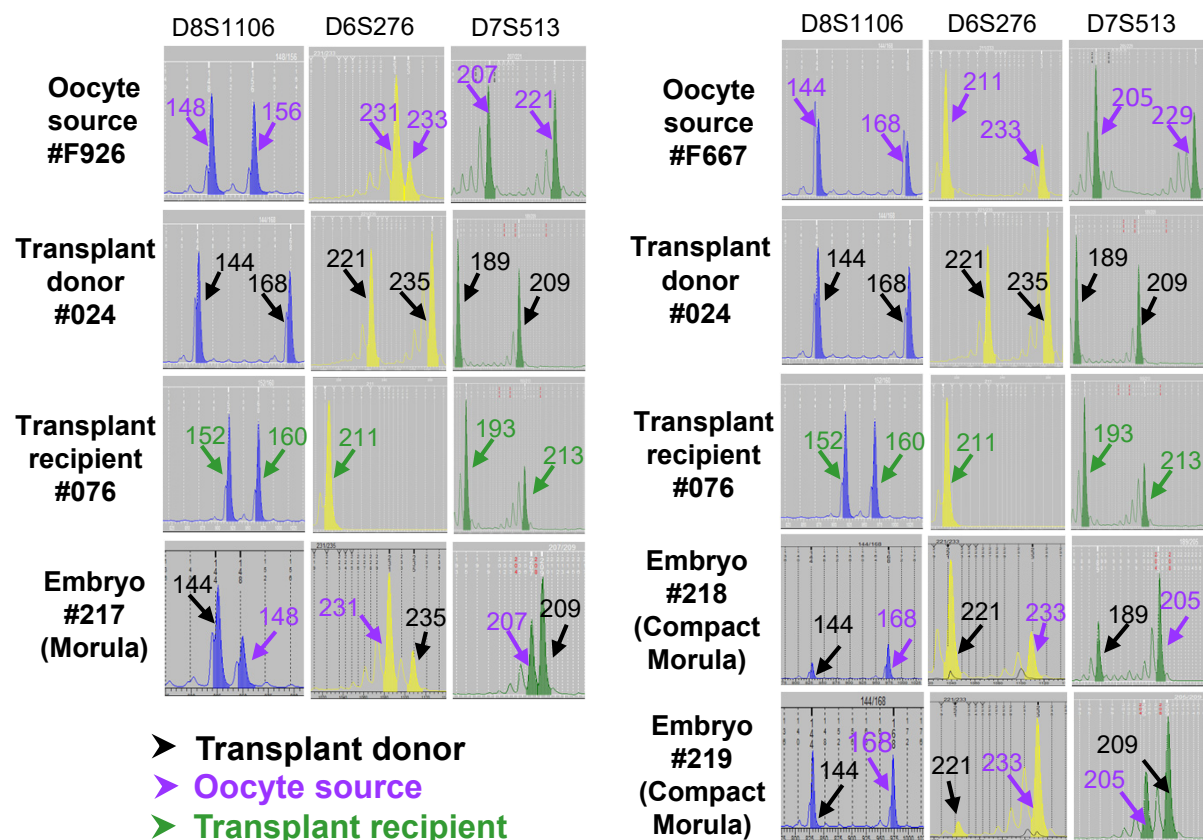

### Parthenogenic Embryos

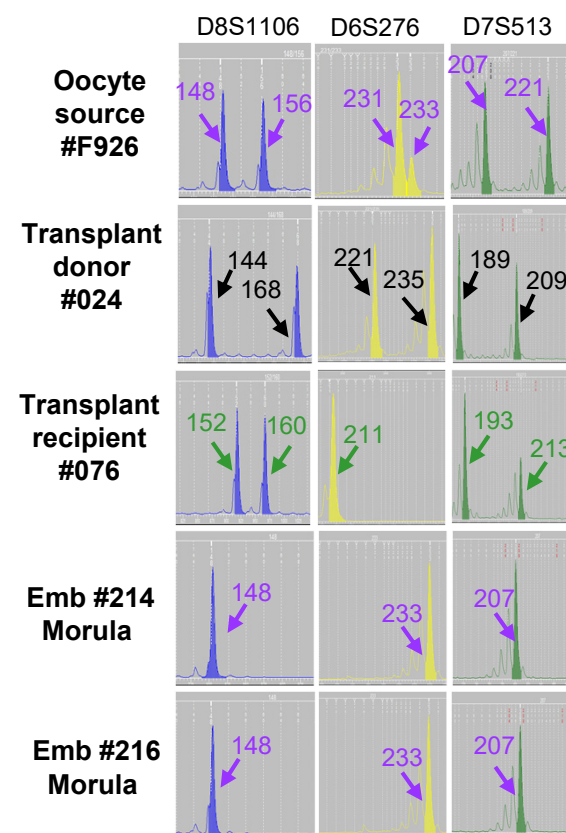

**Supporting Figure S6.** Microsatellite DNA fingerprinting using multiple loci in donor-derived and in parthenogenic embryos. The profiles for three donor-derived embryos (#217, #218 and #219) and for two parthenogenic embryos (#214 and #216), generated by ICSI of epididymal sperm derived from a transplanted testes, are shown. All these embryos were generated by ICSI using the sperm of monkey #076, 93% of which were derived from donor #38024. The DNA profiles for the embryos were compared to those of the oocytes (alleles represented by purple font and arrow), transplant donor (alleles represented by black font and arrow), and transplant recipient (alleles represented by green font and arrow) are shown. Embryos #217, #218, and #219 displayed alleles for both the transplant donor and the oocyte confirming the paternity of the SSC transplant donor (#38024). In contrast, embryos #214 and #216 showed only the alleles specific to the oocyte donor, confirming parthenogenic development of the embryos. The microsatellite loci employed are noted above each column of electropherograms.
